# Supplementary material for: Toll‐like receptor 4 is activated by platinum and contributes to cisplatin‐induced ototoxicity
Source: PubMed Central journal article supplement — EMBO Rep. 2021 Mar 18;22(5):e51280. doi: 10.15252/embr.202051280 (PMC8097357; doi:10.15252/embr.202051280), 2021-03-18
Supplement: EMBR-22-e51280-s009.pdf [file EMBR-22-e51280-s009.pdf]

## Expanded View Figures

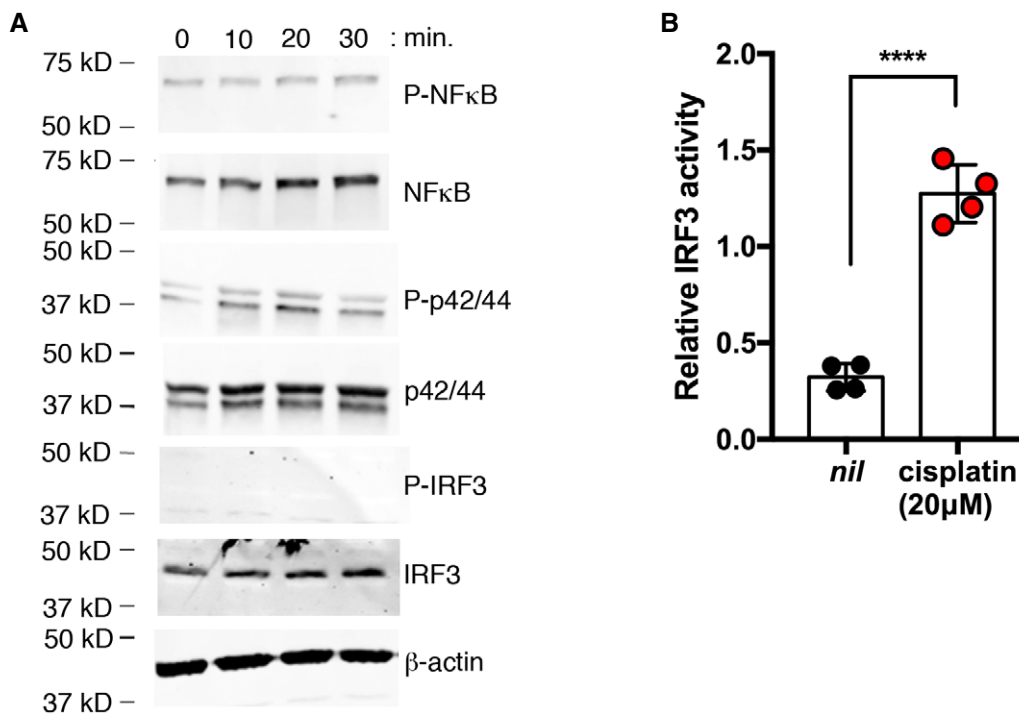

**Figure EV1. Cisplatin induces rapid MyD88-dependent signaling and slower MyD88-independent signaling downstream of Tlr4.**

A Phospho-signaling in HEI-OC1 cells following treatment with 20 μM cisplatin or 10 ng/ml LPS at the indicated time points (representative of 3 independent biological replicates).

B IRF3 reporter activity in HEI-OC1 cells treated with and without 20 μM cisplatin after 24 h (n = 4 independent biological replicates).

Data information: In (B), data are shown as mean and standard deviation. \*\*\*\*P < 0.0001 (unpaired Student's t-test).

Source data are available online for this figure.

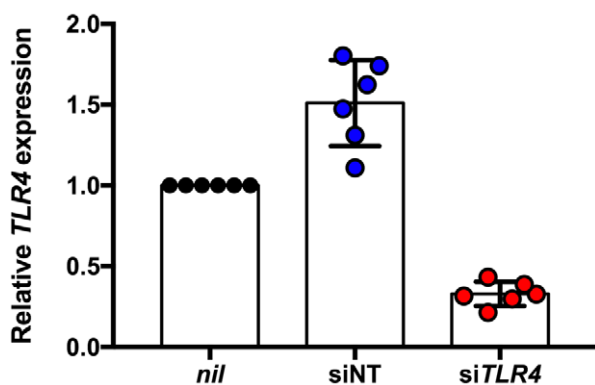

**Figure EV2. TLR4 expression in HeLa cells is significantly reduced by transient silencing.**

TLR4 expression levels (relative to nil treatment) in HeLa cells transfected with non-targeting (siNT) or TLR4-targeting (siTLR4) siRNA molecules and treated with 30 μM cisplatin.

Data information: Actual individual data from 2 independent experiments are plotted with mean and standard deviation indicated.

Source data are available online for this figure.

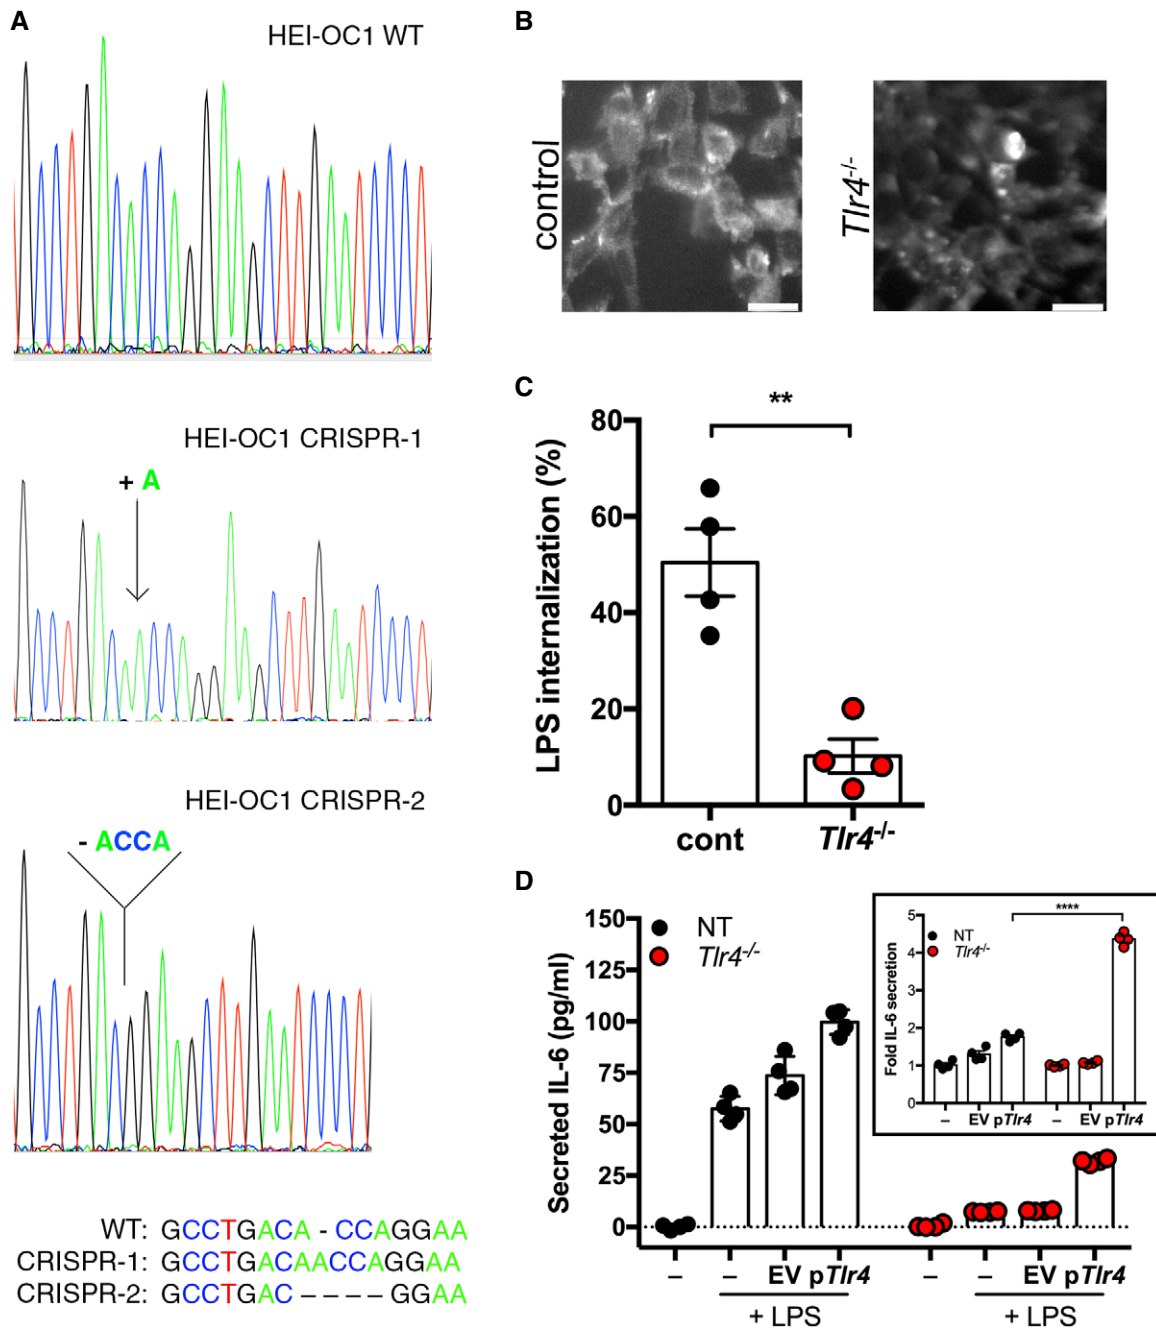

**Figure EV3.** *Tlr4*<sup>-/-</sup> HEI-OC1 cells show diminished LPS-responsiveness unless complemented with *Tlr4*.

**A** Comparison of genomic DNA at the *Tlr4* locus from *Tlr4*<sup>-/-</sup> HEI-OC1 and wild-type cells. Sequences from the *Tlr4*<sup>-/-</sup> cell line contained a single nucleotide insertion or four nucleotide deletion and summarized below.

**B** Anti-TLR4 staining in *Tlr4*<sup>-/-</sup> and control HEI-OC1 cells. Bars (lower right) are 50  $\mu$ m.

**C** Flow cytometric analysis of conjugated LPS internalization in *Tlr4*<sup>-/-</sup> and control HEI-OC1 cells ( $n = 4$  independent biological replicates).

**D** IL-6 secretion in *Tlr4*<sup>-/-</sup> and control HEI-OC1 cells transfected with empty vector (EV), *Tlr4* (*pTlr4*), or left untransfected (-) and subsequently treated with 100 ng/ml LPS ( $n = 4$  independent biological replicates). *Inset*, fold induction of IL-6 secretion was determined relative to the untransfected cells treated with LPS.

Data information: In (C and D), data are presented as mean and standard deviation. Statistical comparisons were assessed by 2-way ANOVA (D). \*\* $P < 0.01$ ;

\*\*\*\* $P < 0.0001$  (unpaired Student's *t*-test, C; Bonferroni test, D).

Source data are available online for this figure.
